# Supplementary material
Source: Springer Nature journal article supplement (https://www.springermedizin.de/resource/supplementary/12889_2010_3241_MOESM2_ESM.pdf/9488258)
Supplement: MOESM2 [file 9488258]

**RCT ID = Reference number in bibliography**

**OA = exclusion protocols for RCTs involving patients with osteoarthritis**

**RA = exclusion protocols for RCTs involving patients with rheumatoid arthritis**

|               | <b>Antithrombotic agents: Platelet aggregation inhibitors excluding heparin</b> |                           | <b>Antithrombotic agents: Vitamin K antagonists</b> | <b>Other anticoagulants: (unspecified)</b> |
|---------------|---------------------------------------------------------------------------------|---------------------------|-----------------------------------------------------|--------------------------------------------|
| <b>RCT ID</b> |                                                                                 |                           |                                                     |                                            |
| <b>OA</b>     |                                                                                 |                           |                                                     |                                            |
| <b>Ref 24</b> | Aspirin                                                                         | Ticlopodine hydrochloride | Warfarin                                            |                                            |
| <b>Ref 26</b> | Aspirin                                                                         | Ticlopodine hydrochloride | Warfarin                                            |                                            |
| <b>Ref 27</b> |                                                                                 |                           |                                                     |                                            |
| <b>Ref 28</b> |                                                                                 |                           |                                                     |                                            |
| <b>Ref 29</b> | Aspirin                                                                         | Ticlopodine hydrochloride |                                                     | Other anticoagulants                       |
| <b>Ref 30</b> | Aspirin                                                                         | Ticlopodine hydrochloride |                                                     | Other anticoagulants                       |
| <b>Ref 33</b> | Aspirin                                                                         | Ticlopodine hydrochloride | Warfarin                                            |                                            |
| <b>Ref 34</b> | Aspirin                                                                         | Ticlopodine hydrochloride | Warfarin                                            |                                            |
| <b>Ref 36</b> |                                                                                 |                           |                                                     |                                            |
| <b>RA</b>     |                                                                                 |                           |                                                     |                                            |
| <b>Ref 23</b> | Aspirin                                                                         | Ticlopodine hydrochloride |                                                     | Other anticoagulants                       |
| <b>Ref 35</b> |                                                                                 |                           |                                                     |                                            |

Protocols for the 7-day safety trial (Ref 32), the 2-week safety trial (Ref 25) and the pooled trial (Ref 31) are not included.
